# Supplementary material for: Controlled synthesis of luminescent Gd2O3:Eu3+nanoparticles by alkali ion doping
Source: Royal Society of Chemistry journal article supplement (doi:10.1039/c4ce02500h), 2015-01-01

Electronic Supplementary Information (ESI)

## Controlled synthesis of luminescent $\text{Gd}_2\text{O}_3:\text{Eu}^{3+}$ nanoparticles by alkali ions doping

Dominika Wawrzynczyk,\* Marek Samoc and Marcin Nyk

*Advanced Materials Engineering and Modelling Group, Wrocław University of Technology,  
Wyb. Wyspińskiego 27, 50-370 Wrocław, Poland*

\*dominika.wawrzynczyk@pwr.edu.pl

### Synthesis of $\text{Gd}_2\text{O}_3:1\%\text{Eu}^{3+}$ nanoparticles

All chemicals for synthesis of  $\text{Gd}_2\text{O}_3:1\%\text{Eu}^{3+}$  nanoparticles were purchased from Sigma Aldrich or Avantor Performance Materials S.A. (Poland), and used without further purification. We have modified the synthesis protocol reported by Paik et al. (Paik et al., *Acs Nano*, 2013, 7, 2850-2859). For synthesis of reference sample without addition of mono-positive alkali ions gadolinium acetate (3 mM) and europium acetate (3 mM) were dissolved and degassed in a mixture of 12 mL of oleic acid, 18 mL of oleylamine, and 30 mL of 1-octadecene at  $\sim 100$  °C. The yellowish, transparent solution was then heated to  $\sim 300$  °C under  $\text{N}_2$  flow. Identical amounts of the reaction solution were picked up with a syringe after 45 min, 1.5 h and 3.5 h, cooled to room temperature, precipitated with a mixture of methanol and acetone (2:1 v/v), and washed several times with methanol. Finally, the nanoparticles were dissolved in 4 mL of  $\text{CHCl}_3$ . In order to investigate the influence of  $\text{Li}^+$ ,  $\text{Na}^+$  and  $\text{K}^+$  ions on the morphology, crystal structure and spectroscopic properties of  $\text{Gd}_2\text{O}_3:1\%\text{Eu}^{3+}$  nanoparticles we have introduced the following changes to the reaction procedure. In a typical synthesis, different amounts (6 mM, 3 mM or 1.5 mM) of either lithium hydroxide, sodium hydroxide or potassium hydroxide were dissolved and degassed in a mixture of 12 mL of oleic acid, 18 mL of oleylamine, and 30 mL of 1-octadecene at  $\sim 100$  °C. Next, gadolinium acetate (3 mM) and europium acetate (3 mM) were added into the solution, followed by the evaporation at  $\sim 100$  °C. The yellowish, transparent solution was then heated to  $\sim 300$  °C under  $\text{N}_2$  flow. Identical amounts of the reaction solution were picked up with a syringe after 45 min, 1.5 h and 3.5 h, cooled to room temperature, precipitated with a mixture of methanol and acetone (2:1 v/v), and washed several times with methanol. Finally, the NPs were dissolved in 4 mL of  $\text{CHCl}_3$ .

**Fig.S1.** XRD patterns of  $\text{Gd}_2\text{O}_3:1\%\text{Eu}^{3+}$  NPs obtained after 1.5h of synthesis, with addition of different amounts of KOH to the reaction mixture (black lines) compared with standard (JCPDS 12-797) pattern of cubic  $\text{Gd}_2\text{O}_3$ . The crystal phase impurities are marked with the \*.

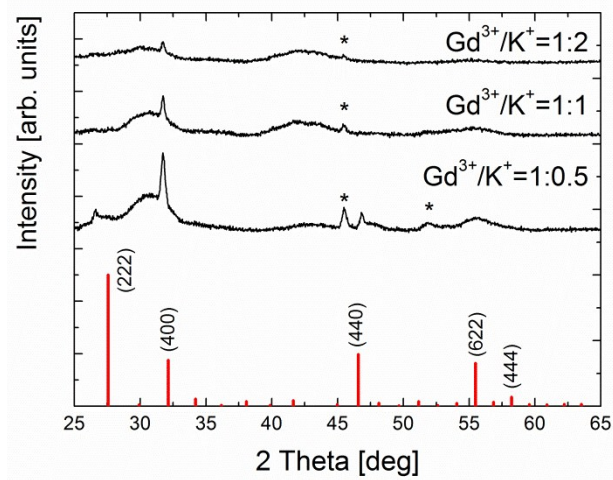

**Fig.S2.** Emission spectra of  $\text{Gd}_2\text{O}_3:1\%\text{Eu}^{3+}$  NPs obtained without addition of any alkali ions after 45 min (a), 1.5h (b) and 3.5h (c) of synthesis. The spectra were obtained upon 266 nm excitation.

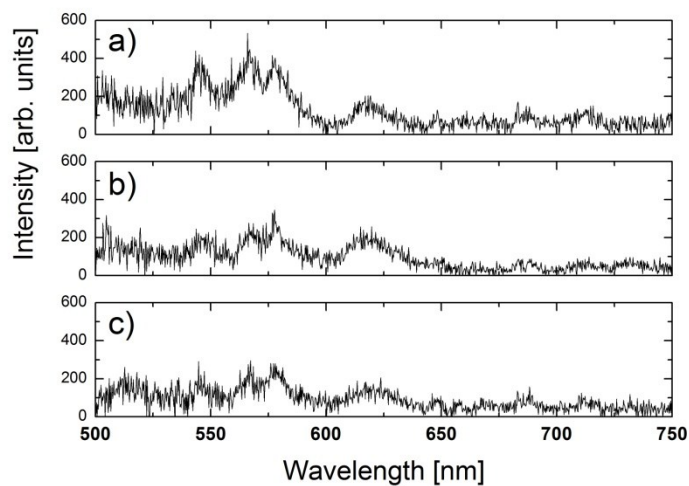

**Fig.S3.** Excitation spectra, recorded at  $\lambda_{em}=613$  nm, of  $Gd_2O_3:1\%Eu^{3+}$  NPs obtained with different relative amounts of  $Gd^{3+}/Na^+$  (a-c),  $Gd^{3+}/Li^+$  (d-f) and  $Gd^{3+}/K^+$  (g-i) after 1.5h of synthesis.

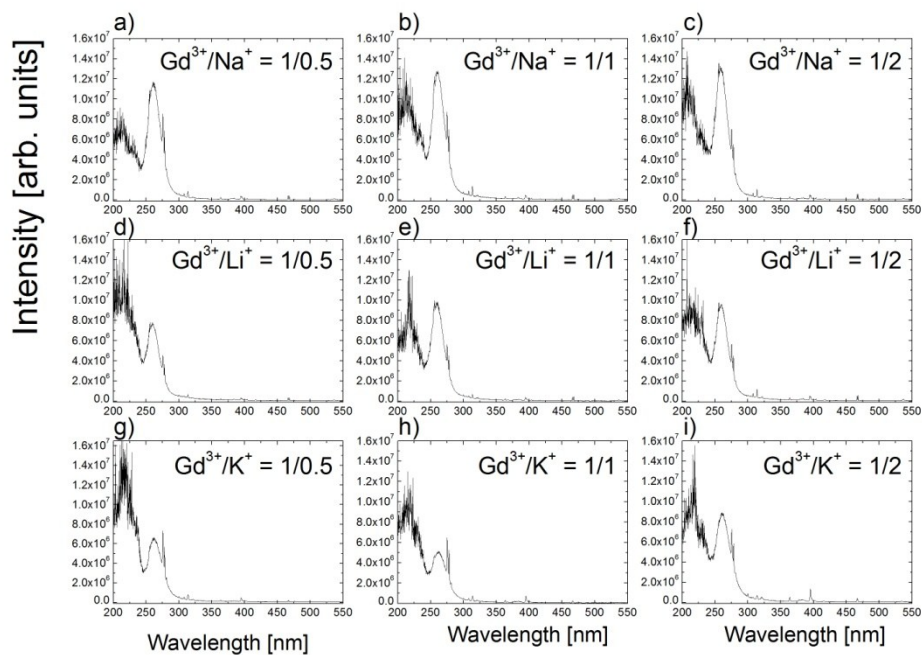

**Fig.S4.** Representative excitation spectra, recorded at  $\lambda_{em}=613$  nm, of  $Gd_2O_3:1\%Eu^{3+}$  NPs obtained with relative amount of  $Gd^{3+}/Na^+$  equal to 1/1 after 45 min of synthesis.

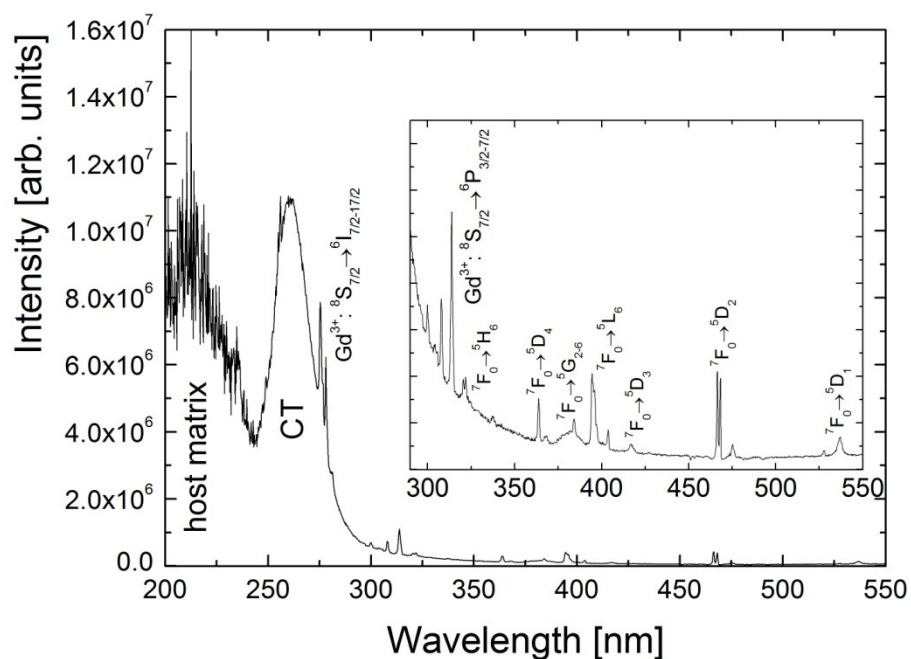

Supplement: c4ce02500h1.pdf [file c4ce02500h1.pdf]
